# Supplementary material for: Effects of Subanesthetic Oromucosal Dexmedetomidine on Sleep in Humans: A Randomized, Controlled Pharmacokinetics–Pharmacodynamics Study
Source: PubMed Central journal article supplement (PMC11801451; doi:10.1097/aln.0000000000005314), 2024-11-27
Supplement: aln-142-476-s001.pdf [file aln-142-476-s001.pdf]

**Supplementary Table S1.** Demographic characteristics of study participants.

|                                      | <b>Healthy good sleepers</b><br>(sublingual DEX intake) | <b>Healthy poor sleepers</b><br>(buccal DEX intake) | <b>p value</b> |
|--------------------------------------|---------------------------------------------------------|-----------------------------------------------------|----------------|
| Sample size (n)                      | 8                                                       | 17                                                  |                |
| Sex ratio (male / female)            | 8 / 0                                                   | 17 / 0                                              |                |
| Age (years)                          | 23.1 ± 3.6                                              | 24.4 ± 3.4                                          | 0.408          |
| Height (cm)                          | 181.9 ± 9.5                                             | 176.9 ± 6.47                                        | 0.208          |
| Weight (kg)                          | 74.9 ± 9.7                                              | 70.0 ± 6.5                                          | 0.224          |
| Body-mass-index (kg/m <sup>2</sup> ) | 22.6 ± 2.0                                              | 22.4 ± 1.8                                          | 0.778          |
| Trait anxiety                        | 42.1 ± 5.1                                              | 45.7 ± 5.8                                          | 0.753          |

Values indicate means ± standard deviations. Trait anxiety: score on the State-Trait Anxiety

Inventory of Spielberger<sup>1</sup>. The two groups did not differ in any of the reported variables as assessed using an independent samples t-test.

#### Reference

- 1 Spielberger, C., Gorsuch, R., Lushene, R., Vagg, P. & Jacobs, G. *Manual for the State-Trait Anxiety Inventory*. Consulting Psychologists Press (1983).
