# Supplementary material for: Effects of Subanesthetic Oromucosal Dexmedetomidine on Sleep in Humans: A Randomized, Controlled Pharmacokinetics–Pharmacodynamics Study
Source: PubMed Central journal article supplement (PMC11801451; doi:10.1097/aln.0000000000005314), 2024-11-27
Supplement: aln-142-476-s002.pdf [file aln-142-476-s002.pdf]

**Supplementary Table S2.** Visually scored sleep variables.

| <b>Sublingual ODT intake   n=8   (Healthy good sleepers)</b> |                |                            |                            |
|--------------------------------------------------------------|----------------|----------------------------|----------------------------|
| <b>Sleep variable</b>                                        | <b>Placebo</b> | <b>DEX<sub>20</sub> µg</b> | <b>DEX<sub>40</sub> µg</b> |
| Total sleep time                                             | 430.75±17.35   | 441.69±28.59               | 444.25±13.97               |
| Sleep efficiency                                             | 90.31±3.53     | 91.83±5.55                 | 92.22±2.90                 |
| Sleep latency                                                | 13.75±10.06    | 9.68±6.25                  | 10.81±6.24                 |
| REM sleep latency                                            | 92.12±16.53    | 172.19±54.79 **            | 189.88±56.87 **            |
| WASO                                                         | 33.50±11.21    | 30.13±21.10                | 28.25±13.56                |
| N1 sleep                                                     | 35.69±10.36    | 30.75±11.59                | 34.88±7.07                 |
| N2 sleep                                                     | 227.50±17.10   | 245.31±26.68 (*)           | 245.50±28.05 (*)           |
| N3 sleep                                                     | 78.19±24.9     | 84.81±13.65                | 89.19±28.58                |
| N2 & N3 sleep                                                | 305.69±25.25   | 330.13±29.82 *             | 334.69±28.57 **            |
| REM sleep                                                    | 89.38±15.40    | 80.81±11.77                | 74.69±17.05 (*)            |
| <b>Buccal ODT intake   n=17   (Healthy poor sleepers)</b>    |                |                            |                            |
| <b>Sleep variable</b>                                        | <b>Placebo</b> | <b>DEX<sub>20</sub> µg</b> | <b>DEX<sub>40</sub> µg</b> |
| Total sleep time                                             | 393.12 ± 42.08 | 413.27 ± 44.07             | 406.59 ± 51.40             |
| Sleep efficiency                                             | 81.95 ± 8.88   | 86.35 ± 9.32               | 84.73 ± 10.7               |
| Sleep latency                                                | 32.41 ± 17.99  | 21.73 ± 14.98 (*)          | 21.09 ± 15.03 *            |
| REM sleep latency                                            | 125.68 ± 49.34 | 173.87 ± 45.75 **          | 242.22 ± 80.02 ***, ##     |
| WASO                                                         | 54.76 ± 40.91  | 44.27 ± 44.06              | 52.47 ± 41.43              |
| N1 sleep                                                     | 30.47 ± 15.87  | 30.63 ± 18.58              | 25.59 ± 13.25              |
| N2 sleep                                                     | 204.76 ± 31.19 | 232.10 ± 33.67 *           | 231.88 ± 36.34 *           |
| N3 sleep                                                     | 85.15 ± 32.37  | 88.80 ± 36.27              | 95.72 ± 35.66              |
| N2 & N3 sleep                                                | 289.91 ± 35.76 | 320.90 ± 45.66 *           | 327.59 ± 37.80 *           |
| REM sleep                                                    | 72.74 ± 30.16  | 61.73 ± 21.05              | 53.41 ± 28.91 (*)          |

Reported values indicate means ± standard deviations in minutes, except sleep efficiency that refers to the percentage of total sleep time per time-in-bed (constant: 480 min), for the sublingual and buccal ODT formulations. Total sleep time = combined stages N1, N2, N3 and REM sleep. WASO = wakefulness after sleep onset.

\*\*\* p < 0.001, \*\* p < 0.01, \* p < 0.05, (\*) p < 0.1 (DEX vs. placebo); ## p < 0.01 (20 µg vs. 40 µg).
