# Supplementary material for: Effects of Subanesthetic Oromucosal Dexmedetomidine on Sleep in Humans: A Randomized, Controlled Pharmacokinetics–Pharmacodynamics Study
Source: PubMed Central journal article supplement (PMC11801451; doi:10.1097/aln.0000000000005314), 2024-11-27
Supplement: aln-142-476-s003.pdf [file aln-142-476-s003.pdf]

**Supplementary Table S3.** Subjective sleep quality, self-rated state and vigilance upon awakening after buccal ODT intake.

|                                                                   | Placebo    | DEX <sub>20</sub> µg | DEX <sub>40</sub> µg | p <sub>PLA-DEX20</sub> | p <sub>PLA-DEX20</sub> | p <sub>DEX20-DEX40</sub> |
|-------------------------------------------------------------------|------------|----------------------|----------------------|------------------------|------------------------|--------------------------|
| <b>Subjective sleep quality</b> (morning questionnaire)           |            |                      |                      |                        |                        |                          |
| Sleep latency (min)                                               | 50.6±41.4  | 34.5±31.7            | 38.6±35.6            | 0.055                  | 0.115                  | 0.491                    |
| Awakenings (#)                                                    | 2.9±2.3    | 3.1±2.4              | 2.9±1.7              | 0.932                  | 0.932                  | 0.932                    |
| Time awake (min)                                                  | 50.8±46.5  | 60.2±63.1            | 56.8±45.6            | 0.852                  | 0.852                  | 0.852                    |
| Restless sleep (VAS)                                              | 39.7±23.7  | 41.5±22.0            | 40.4±24.6            | 0.931                  | 0.931                  | 0.931                    |
| Deep sleep (VAS)                                                  | 54.9±28.0  | 54.1±27.8            | 51.3±26.5            | 0.947                  | 0.947                  | 0.947                    |
| Tired (VAS)                                                       | 41.6±22.4  | 49.2±24.6            | 38.5±20.6            | 0.397                  | 0.633                  | 0.353                    |
| Good mood (VAS)                                                   | 48.6±23.6  | 43.4±17.6            | 52.2±18.6            | 0.573                  | 0.573                  | 0.573                    |
| Full of energy (VAS)                                              | 49.1±22.5  | 44.4±20.3            | 42.4±23.5            | 0.734                  | 0.734                  | 0.791                    |
| Calm (VAS)                                                        | 40.7±22.1  | 32.5±18.0            | 40.9±21.1            | 0.288                  | 0.969                  | 0.288                    |
| Concentrated (VAS)                                                | 58.1±17.2  | 56.2±18.0            | 58.2±24.1            | 0.992                  | 0.992                  | 0.992                    |
| <b>Sleep Inertia Symptoms</b> (Acute Sleep Inertia Questionnaire) |            |                      |                      |                        |                        |                          |
| Physiological                                                     | 2.1±5.0    | 1.6±2.9              | 2.7±3.0              | 0.695                  | 0.695                  | 0.695                    |
| Inertia                                                           | 1.8±7.2    | 2.0±3.7              | 2.8±4.6              | 0.925                  | 0.925                  | 0.925                    |
| Cognitive                                                         | 3.2±4.7    | 1.7±2.8              | 1.4±4.3              | 0.200                  | 0.200                  | 0.786                    |
| Emotional                                                         | 0.1±2.8    | -0.3±2.73            | 0.1±2.0              | 0.865                  | 0.942                  | 0.865                    |
| <b>Subjective Sleepiness</b> (Karolinska Sleepiness Scale)        |            |                      |                      |                        |                        |                          |
| Evening                                                           | 5.8±2.2    | 5.9±1.8              | 5.6±1.8              | 0.934                  | 0.934                  | 0.934                    |
| Morning                                                           | 5.2±2.1    | 5.4±2.1              | 5.1±2.3              | 0.919                  | 0.919                  | 0.919                    |
| <b>Affect</b> (Positive-Negative Affect Schedule)                 |            |                      |                      |                        |                        |                          |
| Positive                                                          | 22.5±7.7   | 23.6±5.1             | 22.3±6.7             | 0.540                  | 0.853                  | 0.540                    |
| Negative                                                          | 13.6±5.5   | 12.6±2.7             | 14.6±6.3             | 0.516                  | 0.516                  | 0.516                    |
| <b>State anxiety</b> (State-Trait Anxiety Inventory)              |            |                      |                      |                        |                        |                          |
| Score                                                             | 39.8±5.7   | 40.1±5.4             | 39.6±6.1             | 0.833                  | 0.833                  | 0.833                    |
| <b>Reaction time, median</b> (Psychomotor Vigilance Task)         |            |                      |                      |                        |                        |                          |
| Evening (ms)                                                      | 297.1±28.7 | 293.2±35.6           | 286.0±39.3           | 0.949                  | 0.188                  | 0.188                    |
| Morning (ms)                                                      | 301.6±39.0 | 293.3±34.9           | 297.8±39.6           | 0.445                  | 0.470                  | 0.480                    |
| <b>Lapses, number</b> (Psychomotor Vigilance Task)                |            |                      |                      |                        |                        |                          |
| Evening (#)                                                       | 2.1±2.5    | 1.5±2.9              | 2.0±3.1              | 0.366                  | 0.898                  | 0.366                    |
| Morning (#)                                                       | 2.7±3.9    | 2.4±3.6              | 3.1±4.1              | 0.554                  | 0.554                  | 0.554                    |

Reported values indicate mean values  $\pm$  standard deviations in key metrics of subjective sleep quality as well as state and vigilance upon awakening in healthy poor sleepers ( $n = 17$ ). The following validated questionnaires and tests were employed: Morning questionnaire <sup>1</sup>, Acute Sleep Inertia Questionnaire <sup>2</sup>, Karolinska Sleepiness Scale <sup>3</sup>, Positive and Negative Affect Scale <sup>4</sup>, State-Trait Anxiety Inventory <sup>5</sup>, and the Psychomotor Vigilance Task (PVT <sup>6</sup>). On the PVT, the median reaction (RT) and the number of lapses (trials with RT > 500 ms) are reported.

## References

- 1 Landolt, H. P. *et al.* Serotonin-2 receptors and human sleep: Effect of a selective antagonist on EEG power spectra. *Neuropsychopharmacol* **21**, 455-466 (1999).
- 2 Dornbierer, D. A. *et al.* A novel bedtime pulsatile-release caffeine formula ameliorates sleep inertia symptoms immediately upon awakening. *Sci Rep-Uk* **11**, e19734, doi:10.1038/s41598-021-98376-z (2021).
- 3 Åkerstedt, T. & Gillberg, M. Subjective and objective sleepiness in the active individual. *International Journal of Neuroscience* **52**, 29-37 (1990).
- 4 Watson, D., Clark, L. A. & Tellegen, A. Development and Validation of Brief Measures of Positive and Negative Affect - the PANAS Scales. *Journal of personality and social psychology* **54**, 1063-1070, doi: 10.1037/0022-3514.54.6.1063 (1988).
- 5 Spielberger, C., Gorsuch, R., Lushene, R., Vagg, P. & Jacobs, G. *Manual for the State-Trait Anxiety Inventory*. Consulting Psychologists Press, 1983.
- 6 Dorrian, J., Rogers, N. L. & Dinges, D. F. in *Sleep Deprivation: Clinical Issues, Pharmacology and Sleep Loss Effects*. (ed. C. Kushida), pp. 39-70. Marcel Dekker, Inc. (2005).
